# Supplementary material for: Synthesis, crystal growth, structural and physicochemical properties of an organic single crystal (C11H16N2O4) for fast scintillation and NLO applications
Source: Royal Society of Chemistry journal article supplement (doi:10.1039/d1ce01674a), 2022-01-01
Supplement: d1ce01674a1.pdf [file d1ce01674a1.pdf]

## Supplementary information

### **Synthesis, crystal growth, structural and physico-chemical properties of an Organic single crystal (C<sub>11</sub>H<sub>16</sub>N<sub>2</sub>O<sub>4</sub>) for fast scintillation and NLO applications**

D. Joseph Daniel<sup>a</sup>, P. Karuppasamy<sup>b</sup>, P.Q. Vuong<sup>a</sup>, H. J. Kim<sup>a,\*</sup>

<sup>a</sup>Center for High-energy Physics, Kyungpook National University, Daegu 41566, South  
Korea

<sup>b</sup>SSN Research Centre, Kalavakkam, Tamilnadu, India – 603 110

\*corresponding author E-mail - [hongjoo@knu.ac.kr](mailto:hongjoo@knu.ac.kr)

Table S1. Atomic coordinates (  $\times 10^4$ ) and equivalent isotropic displacement parameters ( $\text{\AA}^2 \times 10^3$ ) for Glutaricacid.  $U(\text{eq})$  is defined as one third of the trace of the orthogonalized  $U^{ij}$  tensor.

|       | x        | y        | z        | U(eq) |
|-------|----------|----------|----------|-------|
| N(1)  | 5313(5)  | 7678(3)  | 10183(1) | 38(1) |
| C(1)  | 3533(6)  | 8544(3)  | 10177(2) | 46(1) |
| C(2)  | 2032(6)  | 8412(3)  | 9687(2)  | 48(1) |
| C(3)  | 2307(6)  | 7353(3)  | 9176(1)  | 38(1) |
| C(4)  | 4099(6)  | 6483(3)  | 9196(1)  | 37(1) |
| C(5)  | 5650(5)  | 6644(3)  | 9712(1)  | 34(1) |
| C(6)  | 610(6)   | 7188(4)  | 8638(2)  | 48(1) |
| N(2)  | 7432(5)  | 5855(3)  | 9762(1)  | 43(1) |
| N(3)  | 9683(5)  | 7188(3)  | 4821(1)  | 41(1) |
| C(7)  | 7900(7)  | 8058(4)  | 4834(2)  | 53(1) |
| C(8)  | 7618(7)  | 9057(4)  | 5327(2)  | 56(1) |
| C(9)  | 9212(6)  | 9190(3)  | 5838(1)  | 43(1) |
| C(10) | 10948(6) | 8276(3)  | 5820(1)  | 40(1) |
| C(11) | 11188(6) | 7235(3)  | 5303(1)  | 38(1) |
| C(12) | 8902(8)  | 10316(4) | 6378(2)  | 58(1) |
| N(4)  | 12801(5) | 6313(3)  | 5257(1)  | 52(1) |
| O(1)  | 203(5)   | 6387(2)  | 875(1)   | 54(1) |
| O(2)  | -1849(4) | 8205(2)  | 1182(1)  | 51(1) |
| C(13) | -265(6)  | 7387(3)  | 1266(1)  | 36(1) |

|       |         |         |         |       |
|-------|---------|---------|---------|-------|
| C(14) | 1040(6) | 7696(3) | 1879(1) | 39(1) |
| C(15) | 2931(6) | 6724(3) | 1960(1) | 39(1) |
| C(16) | 4120(6) | 7107(3) | 2587(1) | 40(1) |
| C(17) | 6054(6) | 6203(3) | 2709(1) | 37(1) |
| O(3)  | 6732(5) | 5254(2) | 2345(1) | 51(1) |
| O(4)  | 6932(5) | 6575(3) | 3269(1) | 59(1) |
| O(5)  | 3202(4) | 4473(2) | 4133(1) | 49(1) |
| O(6)  | 272(5)  | 5501(3) | 3773(1) | 56(1) |
| C(18) | 1836(6) | 4609(3) | 3714(1) | 38(1) |
| C(19) | 1906(6) | 3671(3) | 3099(1) | 36(1) |
| C(20) | 3988(6) | 2746(3) | 3017(1) | 36(1) |
| C(21) | 3905(6) | 1877(3) | 2378(1) | 38(1) |
| C(22) | 5784(6) | 848(3)  | 2255(1) | 36(1) |
| O(7)  | 7262(5) | 650(3)  | 2617(1) | 62(1) |
| O(8)  | 5654(4) | 170(2)  | 1684(1) | 48(1) |

---

Table S2. Bond lengths [ $\text{\AA}$ ] and angles [ $^\circ$ ] for Glutaricacid.

---

|              |          |
|--------------|----------|
| N(1)-C(5)    | 1.341(4) |
| N(1)-C(1)    | 1.353(4) |
| N(1)-H(1N)   | 0.82(4)  |
| C(1)-C(2)    | 1.348(5) |
| C(1)-H(1)    | 0.9400   |
| C(2)-C(3)    | 1.408(4) |
| C(2)-H(2)    | 0.9400   |
| C(3)-C(4)    | 1.366(4) |
| C(3)-C(6)    | 1.495(5) |
| C(4)-C(5)    | 1.408(4) |
| C(4)-H(4)    | 0.9400   |
| C(5)-N(2)    | 1.319(4) |
| C(6)-H(6A)   | 0.9700   |
| C(6)-H(6B)   | 0.9700   |
| C(6)-H(6C)   | 0.9700   |
| N(2)-H(2A)   | 0.8700   |
| N(2)-H(2B)   | 0.8700   |
| N(3)-C(11)   | 1.347(4) |
| N(3)-C(7)    | 1.353(4) |
| N(3)-H(3N)   | 0.97(4)  |
| C(7)-C(8)    | 1.347(5) |
| C(7)-H(7)    | 0.9400   |
| C(8)-C(9)    | 1.416(5) |
| C(8)-H(8)    | 0.9400   |
| C(9)-C(10)   | 1.362(4) |
| C(9)-C(12)   | 1.494(4) |
| C(10)-C(11)  | 1.404(4) |
| C(10)-H(10)  | 0.9400   |
| C(11)-N(4)   | 1.313(4) |
| C(12)-H(12A) | 0.9700   |
| C(12)-H(12B) | 0.9700   |
| C(12)-H(12C) | 0.9700   |
| N(4)-H(4A)   | 0.8700   |
| N(4)-H(4B)   | 0.8700   |
| O(1)-C(13)   | 1.230(4) |
| O(2)-C(13)   | 1.275(4) |

|                 |          |
|-----------------|----------|
| C(13)-C(14)     | 1.510(4) |
| C(14)-C(15)     | 1.506(4) |
| C(14)-H(14A)    | 0.9800   |
| C(14)-H(14B)    | 0.9800   |
| C(15)-C(16)     | 1.512(4) |
| C(15)-H(15A)    | 0.9800   |
| C(15)-H(15B)    | 0.9800   |
| C(16)-C(17)     | 1.502(4) |
| C(16)-H(16A)    | 0.9800   |
| C(16)-H(16B)    | 0.9800   |
| C(17)-O(3)      | 1.201(4) |
| C(17)-O(4)      | 1.314(4) |
| O(4)-H(4C)      | 0.8300   |
| O(5)-C(18)      | 1.234(4) |
| O(6)-C(18)      | 1.270(3) |
| C(18)-C(19)     | 1.505(4) |
| C(19)-C(20)     | 1.511(4) |
| C(19)-H(19A)    | 0.9800   |
| C(19)-H(19B)    | 0.9800   |
| C(20)-C(21)     | 1.517(4) |
| C(20)-H(20A)    | 0.9800   |
| C(20)-H(20B)    | 0.9800   |
| C(21)-C(22)     | 1.497(4) |
| C(21)-H(21A)    | 0.9800   |
| C(21)-H(21B)    | 0.9800   |
| C(22)-O(7)      | 1.200(4) |
| C(22)-O(8)      | 1.321(4) |
| O(8)-H(8A)      | 0.8300   |
|                 |          |
| C(5)-N(1)-C(1)  | 122.2(3) |
| C(5)-N(1)-H(1N) | 120(3)   |
| C(1)-N(1)-H(1N) | 117(3)   |
| C(2)-C(1)-N(1)  | 120.9(3) |
| C(2)-C(1)-H(1)  | 119.5    |
| N(1)-C(1)-H(1)  | 119.5    |
| C(1)-C(2)-C(3)  | 119.6(3) |
| C(1)-C(2)-H(2)  | 120.2    |
| C(3)-C(2)-H(2)  | 120.2    |

|                   |          |
|-------------------|----------|
| C(4)-C(3)-C(2)    | 118.4(3) |
| C(4)-C(3)-C(6)    | 121.9(3) |
| C(2)-C(3)-C(6)    | 119.6(3) |
| C(3)-C(4)-C(5)    | 120.9(3) |
| C(3)-C(4)-H(4)    | 119.5    |
| C(5)-C(4)-H(4)    | 119.5    |
| N(2)-C(5)-N(1)    | 117.6(3) |
| N(2)-C(5)-C(4)    | 124.4(3) |
| N(1)-C(5)-C(4)    | 117.9(3) |
| C(3)-C(6)-H(6A)   | 109.5    |
| C(3)-C(6)-H(6B)   | 109.5    |
| H(6A)-C(6)-H(6B)  | 109.5    |
| C(3)-C(6)-H(6C)   | 109.5    |
| H(6A)-C(6)-H(6C)  | 109.5    |
| H(6B)-C(6)-H(6C)  | 109.5    |
| C(5)-N(2)-H(2A)   | 120.0    |
| C(5)-N(2)-H(2B)   | 120.0    |
| H(2A)-N(2)-H(2B)  | 120.0    |
| C(11)-N(3)-C(7)   | 122.3(3) |
| C(11)-N(3)-H(3N)  | 121(2)   |
| C(7)-N(3)-H(3N)   | 116(2)   |
| C(8)-C(7)-N(3)    | 120.8(3) |
| C(8)-C(7)-H(7)    | 119.6    |
| N(3)-C(7)-H(7)    | 119.6    |
| C(7)-C(8)-C(9)    | 119.3(3) |
| C(7)-C(8)-H(8)    | 120.4    |
| C(9)-C(8)-H(8)    | 120.4    |
| C(10)-C(9)-C(8)   | 118.7(3) |
| C(10)-C(9)-C(12)  | 122.6(3) |
| C(8)-C(9)-C(12)   | 118.7(3) |
| C(9)-C(10)-C(11)  | 120.9(3) |
| C(9)-C(10)-H(10)  | 119.6    |
| C(11)-C(10)-H(10) | 119.6    |
| N(4)-C(11)-N(3)   | 118.0(3) |
| N(4)-C(11)-C(10)  | 124.1(3) |
| N(3)-C(11)-C(10)  | 117.9(3) |
| C(9)-C(12)-H(12A) | 109.5    |
| C(9)-C(12)-H(12B) | 109.5    |

|                     |          |
|---------------------|----------|
| H(12A)-C(12)-H(12B) | 109.5    |
| C(9)-C(12)-H(12C)   | 109.5    |
| H(12A)-C(12)-H(12C) | 109.5    |
| H(12B)-C(12)-H(12C) | 109.5    |
| C(11)-N(4)-H(4A)    | 120.0    |
| C(11)-N(4)-H(4B)    | 120.0    |
| H(4A)-N(4)-H(4B)    | 120.0    |
| O(1)-C(13)-O(2)     | 122.6(3) |
| O(1)-C(13)-C(14)    | 120.6(3) |
| O(2)-C(13)-C(14)    | 116.8(2) |
| C(15)-C(14)-C(13)   | 115.4(2) |
| C(15)-C(14)-H(14A)  | 108.4    |
| C(13)-C(14)-H(14A)  | 108.4    |
| C(15)-C(14)-H(14B)  | 108.4    |
| C(13)-C(14)-H(14B)  | 108.4    |
| H(14A)-C(14)-H(14B) | 107.5    |
| C(14)-C(15)-C(16)   | 111.6(2) |
| C(14)-C(15)-H(15A)  | 109.3    |
| C(16)-C(15)-H(15A)  | 109.3    |
| C(14)-C(15)-H(15B)  | 109.3    |
| C(16)-C(15)-H(15B)  | 109.3    |
| H(15A)-C(15)-H(15B) | 108.0    |
| C(17)-C(16)-C(15)   | 115.4(2) |
| C(17)-C(16)-H(16A)  | 108.4    |
| C(15)-C(16)-H(16A)  | 108.4    |
| C(17)-C(16)-H(16B)  | 108.4    |
| C(15)-C(16)-H(16B)  | 108.4    |
| H(16A)-C(16)-H(16B) | 107.5    |
| O(3)-C(17)-O(4)     | 123.5(3) |
| O(3)-C(17)-C(16)    | 124.9(3) |
| O(4)-C(17)-C(16)    | 111.6(2) |
| C(17)-O(4)-H(4C)    | 109.5    |
| O(5)-C(18)-O(6)     | 123.3(3) |
| O(5)-C(18)-C(19)    | 120.6(3) |
| O(6)-C(18)-C(19)    | 116.1(3) |
| C(18)-C(19)-C(20)   | 115.0(3) |
| C(18)-C(19)-H(19A)  | 108.5    |
| C(20)-C(19)-H(19A)  | 108.5    |

|                     |          |
|---------------------|----------|
| C(18)-C(19)-H(19B)  | 108.5    |
| C(20)-C(19)-H(19B)  | 108.5    |
| H(19A)-C(19)-H(19B) | 107.5    |
| C(19)-C(20)-C(21)   | 110.2(3) |
| C(19)-C(20)-H(20A)  | 109.6    |
| C(21)-C(20)-H(20A)  | 109.6    |
| C(19)-C(20)-H(20B)  | 109.6    |
| C(21)-C(20)-H(20B)  | 109.6    |
| H(20A)-C(20)-H(20B) | 108.1    |
| C(22)-C(21)-C(20)   | 115.1(3) |
| C(22)-C(21)-H(21A)  | 108.5    |
| C(20)-C(21)-H(21A)  | 108.5    |
| C(22)-C(21)-H(21B)  | 108.5    |
| C(20)-C(21)-H(21B)  | 108.5    |
| H(21A)-C(21)-H(21B) | 107.5    |
| O(7)-C(22)-O(8)     | 122.9(3) |
| O(7)-C(22)-C(21)    | 125.6(3) |
| O(8)-C(22)-C(21)    | 111.5(3) |
| C(22)-O(8)-H(8A)    | 109.5    |

---

Symmetry transformations used to generate equivalent atoms:

Table S3. Anisotropic displacement parameters ( $\text{\AA}^2 \times 10^3$ ) for Glutaricacid. The anisotropic displacement factor exponent takes the form:  $-2\pi^2 [ h^2 a^{*2}U^{11} + \dots + 2 h k a^* b^* U^{12} ]$

|       | U <sup>11</sup> | U <sup>22</sup> | U <sup>33</sup> | U <sup>23</sup> | U <sup>13</sup> | U <sup>12</sup> |
|-------|-----------------|-----------------|-----------------|-----------------|-----------------|-----------------|
| N(1)  | 40(2)           | 39(1)           | 33(1)           | 1(1)            | -5(1)           | 14(1)           |
| C(1)  | 51(2)           | 42(2)           | 41(2)           | -5(1)           | -4(2)           | 20(2)           |
| C(2)  | 44(2)           | 47(2)           | 49(2)           | -5(2)           | -8(2)           | 21(2)           |
| C(3)  | 33(2)           | 41(2)           | 39(2)           | 7(1)            | 1(1)            | 6(1)            |
| C(4)  | 36(2)           | 37(2)           | 34(2)           | 0(1)            | 1(1)            | 8(1)            |
| C(5)  | 32(2)           | 34(2)           | 36(2)           | 4(1)            | 3(1)            | 6(1)            |
| C(6)  | 40(2)           | 59(2)           | 44(2)           | 9(2)            | -8(2)           | 7(2)            |
| N(2)  | 44(2)           | 43(2)           | 40(1)           | -2(1)           | -6(1)           | 20(1)           |
| N(3)  | 46(2)           | 46(2)           | 29(1)           | 1(1)            | -4(1)           | 18(1)           |
| C(7)  | 55(2)           | 66(2)           | 40(2)           | 2(2)            | -9(2)           | 32(2)           |
| C(8)  | 70(3)           | 54(2)           | 44(2)           | 0(2)            | -6(2)           | 40(2)           |
| C(9)  | 52(2)           | 37(2)           | 39(2)           | 4(1)            | 3(2)            | 13(2)           |
| C(10) | 46(2)           | 39(2)           | 32(2)           | 3(1)            | -4(1)           | 10(1)           |
| C(11) | 40(2)           | 40(2)           | 34(2)           | 4(1)            | -5(1)           | 13(1)           |
| C(12) | 82(3)           | 40(2)           | 50(2)           | -2(2)           | 4(2)            | 22(2)           |
| N(4)  | 56(2)           | 57(2)           | 40(2)           | -6(1)           | -13(1)          | 31(2)           |
| O(1)  | 62(2)           | 56(1)           | 38(1)           | -9(1)           | -12(1)          | 34(1)           |
| O(2)  | 58(2)           | 51(1)           | 40(1)           | -5(1)           | -10(1)          | 33(1)           |
| C(13) | 38(2)           | 37(2)           | 33(2)           | 2(1)            | -2(1)           | 12(1)           |
| C(14) | 40(2)           | 36(2)           | 39(2)           | 2(1)            | -5(1)           | 12(1)           |
| C(15) | 43(2)           | 33(2)           | 40(2)           | 2(1)            | -6(1)           | 11(1)           |
| C(16) | 44(2)           | 34(2)           | 39(2)           | 0(1)            | -8(1)           | 14(1)           |
| C(17) | 42(2)           | 34(2)           | 34(2)           | 2(1)            | -4(1)           | 7(1)            |
| O(3)  | 63(2)           | 49(1)           | 41(1)           | -1(1)           | -3(1)           | 29(1)           |
| O(4)  | 72(2)           | 56(2)           | 44(1)           | -6(1)           | -20(1)          | 38(1)           |
| O(5)  | 54(2)           | 56(1)           | 34(1)           | -3(1)           | -8(1)           | 31(1)           |
| O(6)  | 65(2)           | 67(2)           | 36(1)           | -6(1)           | -10(1)          | 45(1)           |
| C(18) | 37(2)           | 44(2)           | 33(2)           | 4(1)            | -4(1)           | 17(1)           |
| C(19) | 34(2)           | 38(2)           | 34(2)           | 1(1)            | -2(1)           | 13(1)           |
| C(20) | 36(2)           | 35(2)           | 35(2)           | 4(1)            | 0(1)            | 13(1)           |
| C(21) | 39(2)           | 38(2)           | 37(2)           | 2(1)            | -2(1)           | 13(1)           |
| C(22) | 40(2)           | 31(2)           | 36(2)           | 0(1)            | -2(1)           | 9(1)            |
| O(7)  | 67(2)           | 66(2)           | 47(1)           | -8(1)           | -19(1)          | 39(1)           |



O(8) 54(2) 48(1) 38(1) -6(1) -4(1) 26(1)

---

Table S4. Hydrogen coordinates ( $\times 10^4$ ) and isotropic displacement parameters ( $\text{\AA}^2 \times 10^{-3}$ ) for Glutaricacid.

|        | x        | y        | z         | U(eq)  |
|--------|----------|----------|-----------|--------|
| H(1N)  | 6280(70) | 7860(40) | 10475(17) | 53(11) |
| H(1)   | 3340     | 9246     | 10519     | 55     |
| H(2)   | 810      | 9024     | 9686      | 58     |
| H(4)   | 4301     | 5766     | 8860      | 44     |
| H(6A)  | 1221     | 6543     | 8300      | 72     |
| H(6B)  | 498      | 8072     | 8529      | 72     |
| H(6C)  | -990     | 6842     | 8736      | 72     |
| H(2A)  | 8338     | 6014     | 10093     | 52     |
| H(2B)  | 7700     | 5174     | 9466      | 52     |
| H(3N)  | 9780(70) | 6490(40) | 4451(17)  | 55(10) |
| H(7)   | 6843     | 7965     | 4494      | 64     |
| H(8)   | 6376     | 9658     | 5332      | 67     |
| H(10)  | 11999    | 8342     | 6159      | 48     |
| H(12A) | 9943     | 10198    | 6711      | 88     |
| H(12B) | 7217     | 10281    | 6495      | 88     |
| H(12C) | 9343     | 11199    | 6278      | 88     |
| H(4A)  | 12873    | 5696     | 4923      | 63     |
| H(4B)  | 13796    | 6318     | 5561      | 63     |
| H(14A) | 1829     | 8630     | 1950      | 47     |
| H(14B) | -175     | 7683     | 2190      | 47     |
| H(15A) | 4180     | 6743     | 1658      | 47     |
| H(15B) | 2164     | 5785     | 1893      | 47     |
| H(16A) | 4843     | 8055     | 2652      | 48     |
| H(16B) | 2851     | 7088     | 2885      | 48     |
| H(4C)  | 8049     | 6087     | 3317      | 88     |
| H(19A) | 2005     | 4236     | 2793      | 43     |
| H(19B) | 372      | 3093     | 3022      | 43     |
| H(20A) | 3877     | 2146     | 3309      | 43     |
| H(20B) | 5539     | 3308     | 3095      | 43     |
| H(21A) | 2290     | 1386     | 2296      | 46     |
| H(21B) | 4105     | 2492     | 2094      | 46     |
| H(8A)  | 6658     | -424     | 1633      | 72     |

---

Table S5. Torsion angles [°] for Glutaricacid.

---

|                         |           |
|-------------------------|-----------|
| C(5)-N(1)-C(1)-C(2)     | -1.1(5)   |
| N(1)-C(1)-C(2)-C(3)     | 0.5(6)    |
| C(1)-C(2)-C(3)-C(4)     | 0.2(5)    |
| C(1)-C(2)-C(3)-C(6)     | 178.7(3)  |
| C(2)-C(3)-C(4)-C(5)     | -0.5(5)   |
| C(6)-C(3)-C(4)-C(5)     | -178.9(3) |
| C(1)-N(1)-C(5)-N(2)     | -179.8(3) |
| C(1)-N(1)-C(5)-C(4)     | 0.8(5)    |
| C(3)-C(4)-C(5)-N(2)     | -179.4(3) |
| C(3)-C(4)-C(5)-N(1)     | -0.1(5)   |
| C(11)-N(3)-C(7)-C(8)    | 2.8(6)    |
| N(3)-C(7)-C(8)-C(9)     | -0.1(6)   |
| C(7)-C(8)-C(9)-C(10)    | -1.8(6)   |
| C(7)-C(8)-C(9)-C(12)    | 179.1(4)  |
| C(8)-C(9)-C(10)-C(11)   | 1.2(5)    |
| C(12)-C(9)-C(10)-C(11)  | -179.7(3) |
| C(7)-N(3)-C(11)-N(4)    | 177.2(3)  |
| C(7)-N(3)-C(11)-C(10)   | -3.3(5)   |
| C(9)-C(10)-C(11)-N(4)   | -179.3(3) |
| C(9)-C(10)-C(11)-N(3)   | 1.3(5)    |
| O(1)-C(13)-C(14)-C(15)  | 1.2(5)    |
| O(2)-C(13)-C(14)-C(15)  | -179.0(3) |
| C(13)-C(14)-C(15)-C(16) | -179.5(3) |
| C(14)-C(15)-C(16)-C(17) | -179.4(3) |
| C(15)-C(16)-C(17)-O(3)  | 2.2(5)    |
| C(15)-C(16)-C(17)-O(4)  | -177.8(3) |
| O(5)-C(18)-C(19)-C(20)  | -9.2(5)   |
| O(6)-C(18)-C(19)-C(20)  | 172.4(3)  |
| C(18)-C(19)-C(20)-C(21) | -178.6(3) |
| C(19)-C(20)-C(21)-C(22) | -176.0(3) |
| C(20)-C(21)-C(22)-O(7)  | 1.7(5)    |
| C(20)-C(21)-C(22)-O(8)  | -177.6(3) |

---

Symmetry transformations used to generate equivalent atoms:
